# Supplementary material for: Combined fragment-based machine learning force field with classical force field and its application in the NMR calculations of macromolecules in solutions
Source: Royal Society of Chemistry journal article supplement (doi:10.1039/d2cp02192g), 2022-01-01
Supplement: d2cp02192g1.pdf [file d2cp02192g1.pdf]

**Electronic Supplementary Information for**

**Combined Fragment-Based Machine Learning Force Field with  
Classical Force Field and its Application in the NMR Calculations of  
Macromolecules in Solutions**

Kang Liao, Shiyu Dong, Zheng Cheng, Wei Li,\* and Shuhua Li\*

*School of Chemistry and Chemical Engineering, Key Laboratory of Mesoscopic  
Chemistry of Ministry of Education, Institute of Theoretical and Computational  
Chemistry, Nanjing University, Nanjing, 210023, P. R. China.*

*E-mail: wli@nju.edu.cn, shuhua@nju.edu.cn*

## 1. The fragmentation of the oligopyridine-dicarboxamide molecule

For the oligopyridine-dicarboxamide molecule (123 atoms), we cut the bond between carbonyl carbon and  $\alpha$ -carbon in the peptide bond (see Fig. S1), which is employed in the treatment of proteins. For the initial structure as shown in Fig. S1, the largest GEBF subsystem consists of three fragments with 58 atoms, as shown in Fig. S2.

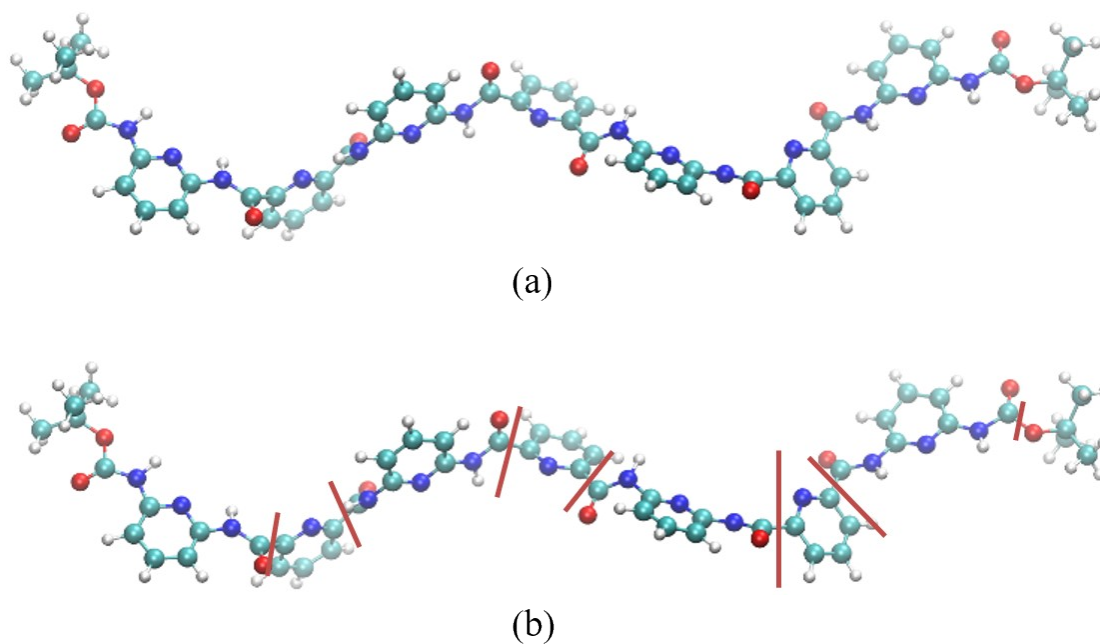

**Fig. S1.** The fragmentation of the oligopyridine-dicarboxamide molecule (123 atoms): (a) The initial structure of the heptamer; (b) The fragmentation scheme of the heptamer, where the red solid line represents the cut bonds.

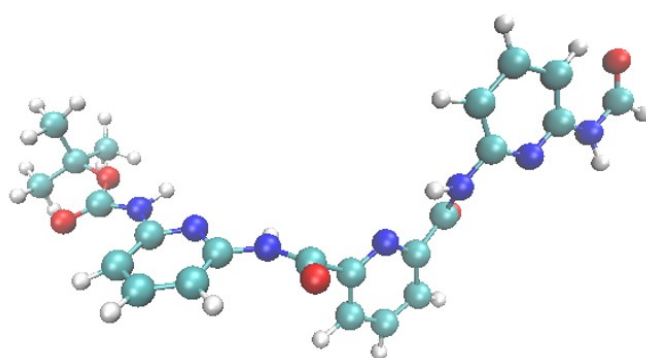

**Fig. S2.** The largest GEBF subsystem, which contains only 58 atoms.

## 2. The GEBF-NMR chemical shift without solvent molecules

**Table S1.** Comparisons of the average GEBF-B97-2 NMR chemical shifts (in ppm) for 15 snapshots from GEBF-NN/MM MD simulations (with and without explicit solvent molecules), and the experimental values for 7 types of hydrogen atoms in the heptamer.

| Type     | Without solvent<br>molecules | With solvent<br>molecules | Exp   |
|----------|------------------------------|---------------------------|-------|
| 1        | 10.08 (-0.19)                | 10.18 (-0.09)             | 10.27 |
| 2        | 10.35 (-0.08)                | 10.23 (-0.20)             | 10.43 |
| 3        | 9.78 (-1.08)                 | 10.10 (-0.76)             | 10.86 |
| 4        | 8.05 (0.53)                  | 8.23 (0.71)               | 7.52  |
| 5        | 8.45 (0.56)                  | 8.59 (0.70)               | 7.89  |
| 6        | 8.22 (0.48)                  | 8.43 (0.69)               | 7.74  |
| 7        | 8.44 (0.26)                  | 8.64 (0.46)               | 8.18  |
| MAE      | 0.45                         | 0.52                      |       |
| $\sigma$ | 0.55                         | 0.33                      |       |
